# Supplementary material for: Surface water monitoring in small water bodies: potential and limitsof multi-sensor Landsat time series
Source: Copernicus journal article supplement (doi:10.5194/hess-2018-19), 2018-01-24
Supplement: Supplementary file [file hess-2018-19-AC2-supplement.pdf]

## **Reply to anonymous Referee #1**

We wish to thank the anonymous reviewer for the valuable, thoughtful comments provided. Please find below a point by point reply to the issues raised and the steps taken to modify the manuscript. References not in the additional manuscript have been specified here. We look forward to finalising the revised manuscript based on these comments and additions.

### **General comments**

**This paper presents an evaluation of the LANDSAT capability to monitor small water bodies in a Central Tunisia. An extensive and accurate evaluation is carried based on a precious dataset extending over fifteen years which makes this work valuable. However, more work should be done for this study to bring an original contribution over previous published literature, since no new methodological developments are implemented neither novel findings from a hydrological point of view are reported.**

We fully agree that part of the strength of this manuscript lies in the long term hydrometric field data for small reservoirs. This allows extensive evaluation of remote sensing methods and specifically their capacity to reproduce hydrological process, here the variability of flood dynamics and long-term water availability in these small water bodies (some of which represent only a few Landsat pixels). As reflected in reviewer #2 comments, the paper does also seek to compare, adapt and optimise available methodologies to the specificities of small reservoirs, notably in terms of lowering water detection index thresholds to capture the shallow waters and waters with standing vegetation, common in small lakes. Furthermore, it develops a suitable approach to maximise image availability whilst minimising the influence of clouds, shadows and SLC off interferences to maintain sufficient temporal resolution and accuracy and capture the rapid flood dynamics in small lakes. We appreciate the relevant suggestions by the reviewer and complementary work is being integrated into the manuscript as detailed below.

**Several issues should be addressed before publication in HESS. The main points are highlighted below:**

**1-The last few years have seen new developments and products release in optical remote sensing that are not addressed by the current study, although they could be quite relevant to the final objective of monitoring small water bodies with a rapid temporal dynamic in time.**

**First, Sentinel 2 data are available since the end of 2015 with a revisit time of 10 days and 5 days since the launch of Sentinel 2B last year. Recent works have shown the capability of Sentinel 2 (alone or in combination to Landsat) to monitor small water bodies using spectral indexes over different regions (i.e. Kaplan et al. 2017, Du et al. 2016 and Zohu et al. 2017). Addressing the potential of Landsat alone, as done in the current study, does not allow to take into account the potential of the multi-sensor combination available with the actual generation of optical satellite sensors.**

The reviewer rightly highlights the raised potential for hydrological monitoring offered by new products such as those offered by the combination of Sentinel-2a and Sentinel-2b. Our ongoing research indeed seeks to quantify the benefits in terms of spatial accuracy, flood dynamics and water availability of Sentinel-2 over Landsat across water bodies of different sizes and flood dynamics in the

Sahel. In this paper, however, we had chosen to focus on the potential of Landsat as for diachronic studies pre-2015 or for long term monitoring as here, Landsat imagery remains the most adequate, freely available source of imagery with albeit limited, spatial and temporal resolution. Nevertheless, this does not detract from the interest and relevance of presenting within this paper results obtained when combining Landsat and Sentinel-2 data.

For this purpose, additional field data for the main lake (Gouazine, where monitoring has continued) has been obtained up to the end of 2017. Additional Landsat 7 and 8 imagery has been acquired and processed using the same treatment chain (radiometric and topographic corrections to surface reflectance, MNDWI water detection, Fmask cloud and shadow detection, etc.). Sentinel 2 data over our region of interest is available since December 2015 and surface reflectance products from the THEIA Sentinel-2 project for the Merguellil catchment over 2015-2017 have been acquired. This additional data is being processed and will be integrated in the manuscript to provide an evaluation of the improvements in terms of NSE and daily surface RMSE and mean annual volume RMSE on small lakes from the multi-sensor combination (L7 ETM+, L8 OLI, S2 MSI) and increased spatial resolution (20m and 10m with pansharpening of SWIR on S2)

**Second, land surface reflectances and cloud mask for the Landsat sensors are available since few years now (Landsat level-2 data). It would be quite interesting to take into account this widely used product in the current study and analyse its impact on the water bodies classification employed in this work.**

Landsat surface reflectance products (L2A) from ESPA indeed became available during our research. As a result, these were not used at the time and the relevant corrections were programmed as per the steps defined in the appendix A. To better inform future users, Landsat 8 L2A ESPA on-demand imagery for the Merguellil catchment for 2013-2015 has now been acquired and flooded areas extracted using MNDWI to be compared with the 13 DGPS contours (to remove uncertainties/errors from hypsometric relations). Results show a marked difference as RMSE reaches 21 200 m<sup>2</sup> with the ESPA surface reflectance products compared to 3 200 m<sup>2</sup> with surface reflectance products through our treatment chain. Results reveal greater difficulties on the smaller lakes but lowering the threshold further to increase the flooded vegetation leads to overestimations on the large lakes. These additional results are being integrated into the revised manuscript and discussed in light of the different atmospheric corrections used (6S-LaSRC, cf. Vermote et al., 2016; Doxani et al., 2018) and the importance of finer topographic corrections (GCM DEM 1km vs. 30m in our method).

The cloud detection algorithm used by USGS is now based on Cmask (Foga et al., 2017), a C version of the same Fmask method we implemented. As a result, the results from using the cloud and shadow values from the level 1 Quality Assessment (QA) bands are identical to those using the Fmask algorithm. The description of cloud and shadow detection in the Methods is being updated to reflect this.

Vermote, E., Justice, C., Claverie, M., & Franch, B. (2016). Preliminary analysis of the performance of the Landsat 8/OLI land surface reflectance product. *Remote Sensing of Environment*, 185, 46-56.

Doxani, G., Vermote, E., Roger, J. C., Gascon, F., Adriaensen, S., Frantz, D., ... & Louis, J. (2018). Atmospheric Correction Inter-Comparison Exercise. *Remote Sensing*, 10(2), 352.

Foga, S., Scaramuzza, P.L., Guo, S., Zhu, Z., Dille, R.D., Beckmann, T., Schmidt, G.L., Dwyer, J.L., Hughes, M.J., Laue, B. (2017). Cloud detection algorithm comparison and validation for operational Landsat data products. *Remote Sensing of Environment*, 194, 379-390.

**2-It is important to discuss the value of this work for hydrological applications: beyond the assessment of the capability of monitoring water areas in the study region (that could be further investigated, see point 2 about it) is the analysis of water areas derived by Landsat over 15 years leading to any new finding on the hydrology of this region (in addition to those reported by Olgvie et al 2016b)?**

This research has indeed led to additional insights into the hydrology of this region. Olgvie et al 2016b illustrate the high interannual and interlake variability identified after developing and transposing the approach across 51 ungauged lakes. The water availability patterns were then confronted with agricultural surveys, questionnaires and interviews to explore to what extent hydrological constraints suffice in explaining agricultural water patterns and what additional socio-economic factors must be accounted for. This work is being submitted for publication. In parallel, the spatialised information of the volumes captured by small lakes is being used to improve hydrological modelling of runoff in these catchments. An Ensemble Kalman filter to integrate the Landsat derived flooded volumes with 7 hydrological models (GR4J + water balance) and improve runoff estimation due to poorly detected rainfall has been developed and this work has been submitted for publication. Finally, further research seeks to combine the Landsat-derived flooded volumes across all 51 lakes, to improve semi-distributed hydrological modelling of the Merguellil catchment. Reducing the uncertainties on the volumes captured by small lakes is notably required to improve watershed management, e.g. to assess groundwater recharge from small lakes and to clarify the cumulative influence of these water conservation works in reducing downstream runoff. These hydrological applications will be mentioned in the discussion and conclusions of the revised manuscript to better highlight the value of this approach for hydrological investigations.

**3-The comparison to the JRC product is a bit misleading since the Peckel database concern “open water” only, while the classification carried out for this paper also includes flooded vegetated area. For the comparison to be meaningful, open water pixels only should be considered. It is however quite interesting to evaluate the proportion of vegetated/flooded area, not taken into account by the JRC database, over open water areas for these small water bodies. To do this, the authors could attempt at classifying separately open water and water with vegetation: would this be possible? (I guess calibration/validation could be more difficult if this information is not reported in the in-situ data base)**

The JRC database focusses on global surface water open water but as stated in Pekel et al., 2016, this is a “Known issue and planned improvement”. Their approach did not include “bodies of water [...] obscured by floating, overhanging and standing vegetation”, and likewise Mueller et al., 2016 highlighted the difficulties due to the “presence of water and vegetation within the pixel” and that their “product may not be fit for [...] small farm dams”. The interest of our comparison with JRC datasets is then to show to what extent our approach can lead to more pertinent evaluation of the flooded areas in small lakes. The text will be clarified accordingly to emphasize that the value of this approach over JRC datasets is precisely because it is capable of detecting with sufficient accuracy, both pixels with only pure water and mixed pixels with floating/standing vegetation. It is notably important to detect the total surface area when using surface-volume relations to assess the runoff volumes captured, or water availability patterns.

As the reviewer rightly states, the field data consists of total lake surface area but does not distinguish pure open water and water with floating/standing vegetation, present both on the edges and centre of water bodies. We propose however to exploit supervised classification on 10m multi-spectral SPOT

imagery available for March 2013 and May 2013 (from an CNES ISIS project) as ground truth to quantify on these 2 images to what extent the difference with the JRC datasets are due to standing/floating vegetation.

**4-Finally, several points need to be better explained or clarified concerning both the methodology and the in-situ measurements (see specific comments below). In particular, a point that needs clarification is the methodology used to derive water areas in-situ: for what I understand for calibration and validation water contours were derived by GPS, but for the long term analysis water levels coupled to bathymetry data were used. If this is the case, more details on the hypsometric relationships applied should be given and an accuracy assessment of water areas derived in this way should be carried out. When the bottom is quite flat (which can happen for flooded areas during the rainy season), small changes in water level can result in significant changes in water area.**

As stated by the reviewer, the calibration and validation of the spectral water indices was performed against DGPS contours to remove uncertainties/errors due to hypsometric relationships. To assess the long-term performance of Landsat imagery to quantify flooded surface areas and volumes, stage data converted using site specific hypsometric (stage-surface-volume) relationships were used. These were acquired over 1990-2007 through previous research projects and additional levelling of Hoshas as part of this research in 2014. A figure has been added to the manuscript to explicit the number of relationships for each lake. To overcome the absence of regular surveys on some lakes (e.g. Morra), silting was modelled based on research on silting in 15 lakes in and around the Merguellil catchment (Albergel et al. 2003). These showed that the decline in capacity over time from silting could be modelled through linear regression. Analysis of these 70 surface-volume rating curves highlighted the progressive shift in the parameters of the rating curve power relation ( $V = B * S^{\beta}$ ). Beta is shown to increase gradually over time, reflecting the decreasingly concave nature of the lakes floor. The evolution over time of the site-specific power relations was therefore calculated based on a gradual annual increase of the beta parameter and an associated decrease in maximum capacity ( $V_{max}$ ). Initial  $V_{max}$  were here known based on the inventories and used to calculate the initial  $S_{max}$ . By supposing that  $S_{max}$  at the spillway does not evolve over time, which is acceptable based on the rating curves in our possession, the resulting B is then calculated over time. In practice, silting is heterogeneous and occurs through sudden, discrete events not a linear, incremental process but local studies confirmed the difficulties in modelling sediment transport in these small catchments (Hentati et al., 2010).

These additional details on the hypsometric relationships applied will be added to the manuscript. Furthermore, accuracy assessments of power relations updated over time to account for silting against the available updated hypsometric rating curves (as per Ogilvie et al. 2016b) as well as additional GPS contours acquired on Morra and Guettar in 2014 will be integrated. The potential to use regular Landsat derived surface area estimates at multiple water levels to create and correct the site-specific hypsometric relationships will also be discussed.

Hentati, A., Kawamura, A., Amaguchi, H., & Iseri, Y. (2010). Evaluation of sedimentation vulnerability at small hillside reservoirs in the semi-arid region of Tunisia using the Self-Organizing Map. *Geomorphology*, 122(1-2), 56-64.

## **Specific comments:**

### **Abstract: line 6: better small instead of smallest**

The text has been rectified accordingly.

### **Pg 2 line 31: 16 days since the 1970s? Prior to Landsat7/8 data are generally much less frequent**

The text has been rectified as follows to better clarify this issue: “Landsat which provides free multispectral images since the 1970s at medium geometric resolution (30 m since Landsat 4 in 1982) every 16 days (since Landsat 7 in 1999, as previous sensors present multiple gaps) therefore continues to provide the most potential to detect and monitor small water bodies.”

### **Pg 3 lines 8-12: this is not very clear given that several studies (including the cited Peckel et al. 2016, Olgivie et al 2016b and Jones et al 2017) analysed the long term dynamics of water bodies including small water bodies**

This section has been reorganised to better clarify the novelty of the respective research papers. Jones et al., 2017 as Liebe et al., 2005 focussed on small lakes to map reservoirs and/or provide a snapshot of floods at certain dates (seasonality or maximum extent), but did not explore their dynamics over time, which introduce further research questions relating to threshold stability, automation, and sufficient image availability to reproduce flood dynamics. As Pekel et al., 2016 state “measuring long term changes remains a challenge”. Pekel et al.’s work provides a remarkable investigation of water dynamics, however their study did not focus specifically on small water bodies. Yamazaki and Trigg 2016, Mueller et al., 2016 and Yamazaki et al., 2015, who also focussed on global Landsat water inventories, recognise difficulties “due to the presence of both water and vegetation within the pixels” and that their “product may not be fit for [...] small farm dams”. Pekel et al. mention omission errors of 23% on seasonal water bodies but “sample pixels of seasonal water bodies within 1° tiles” were used. These therefore do not specifically include or focus on small lakes. Considering the scarcity of ground truth data on small lakes, this is therefore a rare opportunity to specifically quantify the performance on small lakes of long term Landsat monitoring. Olgivie et al. 2016b focussed on developing an approach for ungauged lakes, where no hypsometric relationships were available and illustrating applications on 51 lakes.

### **Pg 3 line 20: the term “low resolution” is a bit confusing. Does it refer to Landsat 30m resolution? Or to medium resolution sensors like the cited MODIS?**

This paragraph refers to the work undertaken to provide long term monitoring at regional and global scale with Landsat imagery. The sentence has therefore been modified to: “These errors on small lakes are influenced by the insufficient spatial resolution but essentially by the increased presence of flooded vegetation and shallow waters which affect the reflectance signal...”

### **Pg 3 last par: temporality issues can be now better addressed by combining to Sen-tinel2 (i.e. Kaplan et al. 2017, Du et al. 2016 and Zohu et al. 2017), see general comment above**

As stated, under the general comment 1 in this document, this paper chose to focus on Landsat’s ability, considering that “Recent sensors such as Sentinel-2 capture 10 m images of the entire globe every 5 days providing enhanced opportunities but hydrological investigations which require historical perspectives will continue to rely on previous sensors”, here Landsat. This section on page 3 therefore refers to the issues relating to “Landsat imagery to map and monitor small water bodies “ However as stated, under general comment 1, a specific comparison of the combined benefit of using Landsat and Sentinel-2 since 2015 is being integrated to the manuscript.

**Pg 5 section 2.2. this section should be more clearly written (see point 4 above): how many GPS contours were available? And more important: how in situ areas for the long term analysis were derived? (line 13 refers to water volumes derived from stage values, what about areas?)? An accuracy assessment on the in-situ measurements would be more than welcomed!**

This section has been modified as follows : “19 GPS contours were acquired, providing a range of flooded surface areas from 0.2 ha to 7.8 ha (Table 2) to test the performance of indices.”

“Stage values were converted to surface areas and water volumes using rating curves available for each lake.” As described in general comment 4, further details and an accuracy assessment of the rating curves is being added to the manuscript.

**Section 2.5: employing different metrics allows a complete evaluation of Landsat performances. However the manuscript is a bit confusing about it (minimum RMSE is used to define the thresholds, PDAI for validation purposes, RMSE and NSE for the long term analysis). A table summarising all the metrics employed would help the reader. For completeness, RMSE could be also reported in Table 2 and mean PDAI in table 3.**

We indeed chose to use a variety of metrics to allow a complete and relevant evaluation of Landsat’s performance. Confusion matrices were used as is common practice to quantify the classification accuracy of the water detection indices. PDAI was added to provide a directly relevant assessment of the resulting surface area error on each lake. To calibrate the clouds, shadow and SLC off thresholds (% of interference tolerated) to maximise image availability whilst reducing the detrimental influence of these interferences, RMSE over the 15 years of data were calculated and minimised (using 5% increments of each interference). The skill of the method in terms of flood dynamics and water availability were then calculated in terms of RMSE and NSE to highlight how well the results of the method fit the observed values (NSE) and in terms of the amplitude of the errors (RMSE). RMSE was not included in table 2 as these are errors on single values (i.e. each image and each lake). In table 3, we feel RMSE is more appropriate than mean PDAI, as mean PDAI would be significantly influenced by individual outliers and does therefore not provide as good an indication of mean error as RMSE. Based on the reviewer’s recommendation we have gathered in table 2 all metrics relating to the calibration/validation of the water detection indices (i.e. results over 7 lakes and 3 images). Table 3 presents all the metrics relating to the 7 (different) lakes used in long term monitoring (i.e. results over 7 different lakes and 546 images).

**Fig 3: this example shows one of the biggest lake analysed. Given the paper focus on small water bodies, it would be interesting to add some examples of MNDWI performances for smaller lakes, and discuss this in term of the amount of vegetated and/or mixed pixels.**

Additional figures of the performance of the MNDWI approach against the DGPS contours on other small lakes have been added. Further to our reply under general comment 3, we propose to use the classified SPOT 10m imagery for May 2013 to distinguish open water and vegetated pixels and illustrate here which pixels are correctly classified with MNDWI and with the JRC database.

**Fig. 12 This figure would be more informative if the authors could add the information on the MNDWI points directly derived from Landsat data and those interpolated**

The figure has been modified to add points for the values of the individual Landsat observations.

**Section 3.3.3 lines 21-24: As already pointed out this should be better clarified in the methodology section. An error analysis seems necessary.**

Please see reply under general comments 4 and details on the error analysis to be included.

**Section 3.5 see point 3 in general comments. Fig. 15 Given that the JRC dataset only concern “open water” a 1:1 line should not be expected**

Please also see reply to general comment 3. This figure seeks specifically to show how JRC datasets lead to errors on small water bodies, due to their specificities (which include shallow waters, and standing/floating vegetation) which the method developed by Pekel et al. is currently unable to include. Additional comparisons have now been added to clarify these differences.

**Conclusion pg 23, line 32 reference to SWOT is not appropriate given the focus on small water bodies. SWOT mission spec are indeed given for water bodies with area above 1 km<sup>2</sup> Line 33: Low cloud: not if radar is used (i.e. Sentinel1)**

The reference to SWOT has been removed. Line 33 has been modified to clarify that these comments refer only to optical sensors and Sentinel-1 has been specifically mentioned in line 3 page 24 after active sensors.

“Monitoring flood dynamics with optical sensors remains however dependent on low cloud cover and results here point to the value of assessing their presence at the lake and not image level.”

“Alternate optimisation of clouds & SLC-off or concomitant imagery sources including active sensors (e.g. Sentinel-1) could also be used to maintain more observations at critical stages such as flood peaks (Eilander et al., 2014).”

**Appendix A: see point 2 in the general comments concerning the Landsat land surface products**

Please see reply under point 1 in the general comments.

**Technical comments:**

**Fig 7: white dots are difficult to see, please change the color table**

The figure has been modified accordingly.
